# Supplementary material
Source: publisher figshare collection journal article supplement (https://sage.figshare.com/ndownloader/files/15254768)
Supplement: Supplementary file 1 [file 15254768]

**Supplemental Online Appendix**  
*for*  
**Where Women Make a Difference: Gender Quotas and Firm' Performance in Three  
European Countries**  
**(Effect of Gender Quota Legislation on Board Composition)**

**Simona Comi, Mara Grasseni, Federica Origo, and Laura Pagani**

The relationship between gender quota legislation and women's representation can be analyzed using the following regression based on the European Commission country-year panel:

$$(1) \quad P_{j,t} = \alpha + \beta TREATED_{j,t} + \sum_{t \in T} \gamma_t YEAR_t + \sum_{j \in J} \delta_j COUNTRY_j + e_{j,t}$$

where  $P_{j,t}$  is the share of women on boards in country  $j$  and year  $t$ ,  $TREATED_{j,t}$  is a dummy for country/period observations with a gender quota legislation,  $YEAR_t$  are year dummies intended to control for shocks that are common to all countries,  $COUNTRY_j$  are country dummies controlling for time invariant differences between countries, and  $e_{j,t}$  is the error term. We estimate Equation (1) with controls for country-specific time trends as well in order to consider the possibility of nonparallel evolution in the proportion of women on boards in the absence of a gender quota. Both specifications are estimated also with weighted least squares, using countries' populations as weights. Standard errors are adjusted for heteroscedasticity.

The estimates of  $\beta$  reported in Table A.1 suggest that gender quotas caused a statistically significant increase, ranging between 5.9 and 10.9 percentage points, in the share of women on boards.<sup>1</sup>

---

<sup>1</sup> Note that the data provided by the European Commission are biased toward the largest firms, and large firms may react to gender quotas differently from how small firms react. Nonetheless, in the section containing further evidence on Italy, we show a qualitatively similar result for Italy for which we have data on boards' composition for all treated firms before and after the introduction of mandatory gender quotas.

Table A.1. Regression Estimates of Gender Quotas Law on the Proportion of Women  
on Boards of Directors

|              | (1)                  | (2)                  | (3)                        | (4)                     |
|--------------|----------------------|----------------------|----------------------------|-------------------------|
| Treated      | 10.335***<br>(1.242) | 10.923***<br>(1.300) | 6.395***<br>(1.609)        | 5.928***<br>(1.516)     |
| Constant     | 22.866***<br>(2.059) | 18.469***<br>(3.899) | −1,055.091***<br>(366.877) | −641.981<br>(1,585.043) |
| State trends | No                   | No                   | Yes                        | Yes                     |
| Weights      | No                   | Yes                  | No                         | Yes                     |
| Observations | 444                  | 444                  | 444                        | 444                     |
| R-squared    | 0.778                | 0.835                | 0.913                      | 0.932                   |

*Notes:* Robust standard errors in parentheses.

\*\*\*  $p < 0.01$ ; \*\*  $p < 0.05$ ; \*  $p < 0.1$ .

Table A.2. Average Characteristics for Treatment and Control Groups

| <b>Panel A: France</b>        |                 |                 |                    |                                           |                 |                     |                                      |                 |                    |
|-------------------------------|-----------------|-----------------|--------------------|-------------------------------------------|-----------------|---------------------|--------------------------------------|-----------------|--------------------|
|                               | (1)             |                 |                    | (2)                                       |                 |                     | (3)                                  |                 |                    |
|                               | DD Whole sample |                 |                    | Local DD sample:<br>very narrow bandwidth |                 |                     | Local DD sample:<br>narrow bandwidth |                 |                    |
|                               | Treated<br>(T)  | Control<br>(C)  | Diff. C-T<br>(SE)  | Treated                                   | Control         | Diff. C-T<br>(SE)   | Treated                              | Control         | Diff. C-T<br>(SE)  |
| Log of sales                  | 12.24<br>(1.28) | 11.50<br>(1.08) | -0.73*<br>(0.043)  | 11.37<br>(0.31)                           | 11.13<br>(0.36) | -0.24***<br>(0.054) | 11.49<br>(0.34)                      | 11.17<br>(0.34) | -0.32***<br>(0.04) |
| Log of number of<br>employees | 6.80<br>(1.17)  | 5.93<br>(0.92)  | -0.87***<br>(0.04) | 6.34<br>(0.20)                            | 6.34<br>(0.20)  | -0.027<br>(0.02)    | 6.39<br>(0.20)                       | 6.03<br>(0.209) | -0.36***<br>(0.02) |
| Log of labor<br>productivity  | 4.20<br>(0.55)  | 4.22<br>(0.50)  | 0.015<br>(0.019)   | 3.94<br>(0.34)                            | 3.95<br>(0.34)  | 0.016<br>(0.05)     | 3.96<br>(0.36)                       | 3.99<br>(0.35)  | 0.02<br>(0.04)     |
| Log of TFP                    | 3.98<br>(0.86)  | 3.93<br>(1.16)  | 0.044<br>(0.035)   | 3.80<br>(0.10)                            | 3.70<br>(1.62)  | -0.099<br>(0.22)    | 3.84<br>(0.74)                       | 3.79<br>(1.50)  | -0.05<br>(0.16)    |
| ROA                           | 4.71<br>(10.14) | 5.05<br>(8.76)  | 0.33<br>(0.34)     | 2.85<br>(11.9)                            | 3.72<br>(12.4)  | 0.87<br>(1.90)      | 2.53<br>(10.5)                       | 4.32<br>(11.5)  | 1.79<br>(1.37)     |
| Log of leverage               | 3.79<br>(1.27)  | 3.47<br>(1.42)  | -0.32***<br>(0.05) | 3.94<br>(1.40)                            | 3.59<br>(1.27)  | -0.34<br>(0.21)     | 3.86<br>(1.36)                       | 3.59<br>(1.28)  | -0.28<br>(0.17)    |
| % manufacturing firms         | 0.367<br>(0.48) | 0.367<br>(0.48) | 0<br>(0.018)       | 0.389<br>(0.49)                           | 0.465<br>(0.50) | 0.075<br>(0.077)    | 0.47<br>(0.50)                       | 0.47<br>(0.50)  | -0.021<br>(0.06)   |
| Number of firms in<br>2011    | 4,040           | 808             | —                  | 54                                        | 170             | —                   | 92                                   | 249             | —                  |
| <b>Panel B: Italy</b>         |                 |                 |                    |                                           |                 |                     |                                      |                 |                    |
|                               | DD Whole sample |                 |                    |                                           |                 |                     |                                      |                 |                    |
|                               | Treated<br>(T)  | Control<br>(C)  | Diff. C-T<br>(SE)  |                                           |                 |                     |                                      |                 |                    |
| Log of sales                  | 12.47<br>(1.85) | 12.10<br>(1.59) | -0.36***<br>(0.13) |                                           |                 |                     |                                      |                 |                    |
| Log of number of<br>employees | 6.77<br>(1.96)  | 6.41<br>(1.71)  | -0.36**<br>(0.14)  |                                           |                 |                     |                                      |                 |                    |
| Log of labor<br>productivity  | 4.52<br>(0.73)  | 4.47<br>(0.65)  | -0.053<br>(0.055)  |                                           |                 |                     |                                      |                 |                    |
| Log of TFP                    | 5.30<br>(2.88)  | 5.17<br>(2.66)  | -0.13<br>(0.22)    |                                           |                 |                     |                                      |                 |                    |
| ROA                           | 1.98<br>(8.54)  | 3.30<br>(6.83)  | 1.31**<br>(0.60)   |                                           |                 |                     |                                      |                 |                    |
| Log of leverage               | 4.46            | 4.48            | 0.024              |                                           |                 |                     |                                      |                 |                    |

|                         |        |        |        |
|-------------------------|--------|--------|--------|
|                         | (1.14) | (1.24) | (0.10) |
| % manufacturing firms   | 0.3815 | 0.3815 | 0      |
|                         | (0.48) | (0.48) | (0.04) |
| Number of firms in 2011 | 173    | 865    | —      |

**Panel C: Spain**

|                            | DD Whole sample  |                  |                     | Local DD sample:<br>bandwidth 25 employees |                 |                      | Local DD sample:<br>bandwidth 50 employees |                 |                     |
|----------------------------|------------------|------------------|---------------------|--------------------------------------------|-----------------|----------------------|--------------------------------------------|-----------------|---------------------|
|                            | Treated<br>(T)   | Control<br>(C)   | Diff. C-T<br>(SE)   | Treated                                    | Control         | Diff. C-T<br>(SE)    | Treated                                    | Control         | Diff. C-T<br>(SE)   |
| Log of sales               | 11.54<br>(1.15)  | 10.69<br>(0.89)  | -0.85***<br>(0.02)  | 10.74<br>(0.78)                            | 10.88<br>(0.79) | 0.13<br>(0.10)       | 10.81<br>(0.84)                            | 10.73<br>(0.86) | -0.07<br>(0.07)     |
| Log of number of employees | 6.35<br>(0.68)   | 5.15<br>(0.37)   | -1.20***<br>(0.013) | 5.56<br>(0.002)                            | 5.47<br>(0.002) | -0.092***<br>(0.003) | 5.60<br>(0.06)                             | 5.41<br>(0.05)  | -0.19***<br>(0.005) |
| Log of labor productivity  | 4.06<br>(0.68)   | 4.18<br>(0.57)   | 0.12***<br>(0.018)  | 4.02<br>(0.50)                             | 4.06<br>(0.49)  | 0.035<br>(0.06)      | 4.05<br>(0.55)                             | 4.08<br>(0.56)  | 0.032<br>(0.05)     |
| Log of TFP                 | 3.87<br>(1.14)   | 3.94<br>(0.89)   | 0.076***<br>(0.02)  | 3.91<br>(0.088)                            | 3.84<br>(0.078) | -0.069<br>(0.12)     | 3.95<br>(0.91)                             | 3.91<br>(1.00)  | -0.04<br>(0.08)     |
| ROA                        | 7.46<br>(11.23)  | 7.68<br>(8.54)   | 0.22<br>(0.27)      | 8.36<br>(10.01)                            | 5.36<br>(9.37)  | -3.00*<br>(1.18)     | 7.85<br>(11.3)                             | 6.98<br>(10.1)  | -0.86<br>(0.94)     |
| Log of leverage            | 3.67<br>(1.75)   | 3.46<br>(1.84)   | -0.20***<br>(0.057) | 3.75<br>(1.56)                             | 4.00<br>(1.47)  | 0.24<br>(0.19)       | 3.74<br>(1.53)                             | 3.83<br>(1.58)  | 0.08<br>(0.14)      |
| % manufacturing firms      | 0.347<br>(0.476) | 0.347<br>(0.476) | 0<br>(0.014)        | 0.33<br>(0.47)                             | 0.48<br>(0.50)  | 0.15**<br>(0.06)     | 0.37<br>(0.48)                             | 0.45<br>(0.50)  | 0.077<br>(0.044)    |
| Number of firms in 2007    | 1,268            | 6,340            |                     | 112                                        | 164             | —                    | 195                                        | 339             | —                   |

*Notes:* Standard deviations (SE) in parentheses if not otherwise specified. Treated: firms to which gender quotas would have been applied in 2011 (2007 for Spain). Control: non-treated firms of the same country matched to the treated ones. DD, difference-in-difference; ROA, an indicator of profitability; TFP, total factor productivity.

Table A.3. Tests for Parallel Trends for DD Estimates, France (2004–2011)

|                                                                        | (1)                   | (2)                  | (3)                    | (4)                  | (5)                  |
|------------------------------------------------------------------------|-----------------------|----------------------|------------------------|----------------------|----------------------|
|                                                                        | Labor<br>productivity | TFP                  | Number of<br>employees | ROA                  | Leverage             |
| <b>Panel A: DD parallel trend test</b>                                 |                       |                      |                        |                      |                      |
| Treated $\times$ trend                                                 | −0.004**<br>[0.002]   | −0.008***<br>[0.002] | −0.023***<br>[0.004]   | −0.048<br>[0.062]    | 0.006<br>[0.008]     |
| Trend                                                                  | 0.016***<br>[0.001]   | 0.018***<br>[0.001]  | 0.047***<br>[0.002]    | −0.452***<br>[0.031] | −0.019***<br>[0.005] |
| Observations                                                           | 27,526                | 27,526               | 27,526                 | 27,518               | 26,213               |
| Number of firms                                                        | 0.057                 | 0.030                | 0.101                  | 0.059                | 0.015                |
| R-squared                                                              | 4,955                 | 4,955                | 4,955                  | 4,954                | 4,899                |
| <b>Panel B: “Local” DD parallel trend test: bandwidth 30 employees</b> |                       |                      |                        |                      |                      |
| Treated $\times$ trend                                                 | −0.006<br>[0.006]     | −0.008<br>[0.006]    | −0.003<br>[0.010]      | −0.203<br>[0.248]    | 0.040<br>[0.039]     |
| Trend                                                                  | 0.013***<br>[0.003]   | 0.014***<br>[0.003]  | 0.022***<br>[0.006]    | −0.642***<br>[0.162] | 0.017<br>[0.019]     |
| Observations                                                           | 1,546                 | 1,546                | 1,546                  | 1,546                | 1,453                |
| Number of firms                                                        | 0.082                 | 0.033                | 0.060                  | 0.086                | 0.033                |
| R-squared                                                              | 224                   | 224                  | 224                    | 224                  | 222                  |
| <b>Panel C: Local” DD parallel trend test: bandwidth 50 employees</b>  |                       |                      |                        |                      |                      |
| Treated $\times$ trend                                                 | −0.007<br>[0.004]     | −0.010**<br>[0.005]  | 0.000<br>[0.008]       | −0.149<br>[0.179]    | 0.016<br>[0.028]     |
| Trend                                                                  | 0.013***<br>[0.003]   | 0.015***<br>[0.003]  | 0.017***<br>[0.004]    | −0.663***<br>[0.125] | 0.014<br>[0.014]     |
| Observations                                                           | 2,351                 | 2,351                | 2,351                  | 2,350                | 2,214                |
| Number of firms                                                        | 0.072                 | 0.032                | 0.042                  | 0.095                | 0.023                |
| R-squared                                                              | 341                   | 341                  | 341                    | 341                  | 339                  |

Notes: Standard errors in brackets. DD, difference-in-difference; ROA, an indicator of profitability; TFP, total factor productivity.

\*\*\*  $p < 0.01$ ; \*\*  $p < 0.05$ ; \*  $p < 0.1$ .

Table A.4. Tests for Parallel Trends for DD Estimates, Italy (2004–2011)

|                        | (1)                   | (2)                 | (3)                    | (4)                  | (5)                  |
|------------------------|-----------------------|---------------------|------------------------|----------------------|----------------------|
|                        | Labor<br>productivity | TFP                 | Number of<br>employees | ROA                  | Leverage             |
| Treated $\times$ trend | –0.002<br>[0.007]     | 0.007<br>[0.007]    | 0.000<br>[0.010]       | –0.185<br>[0.114]    | 0.042***<br>[0.013]  |
| Trend                  | –0.013***<br>[0.003]  | –0.004*<br>[0.003]  | 0.038***<br>[0.004]    | –0.371***<br>[0.040] | –0.020***<br>[0.006] |
| Constant               | 3.105***<br>[0.120]   | 5.208***<br>[0.012] | 6.234***<br>[0.017]    | 6.279***<br>[0.187]  | 4.530***<br>[0.027]  |
| Observations           | 6,798                 | 6,798               | 6,798                  | 6,798                | 6,572                |
| Number of firms        | 0.172                 | 0.001               | 0.071                  | 0.044                | 0.008                |
| <i>R</i> -squared      | 1,103                 | 1,103               | 1,103                  | 1,103                | 1,091                |

*Notes:* Standard errors in brackets. DD, difference-in-difference; ROA, an indicator of profitability; TFP, total factor productivity.

\*\*\*  $p < 0.01$ ; \*\*  $p < 0.05$ ; \*  $p < 0.1$ .

Table A.5. Tests for Parallel Trends for DD Estimates, Spain (2004–2007)

|                                                                        | (1)                   | (2)                  | (3)                    | (4)                  | (5)                  |
|------------------------------------------------------------------------|-----------------------|----------------------|------------------------|----------------------|----------------------|
|                                                                        | Labor<br>productivity | TFP                  | Number of<br>employees | ROA                  | Leverage             |
| <b>Panel A: DD parallel trend test</b>                                 |                       |                      |                        |                      |                      |
| Treated $\times$ trend                                                 | −0.024***<br>[0.004]  | −0.023***<br>[0.004] | 0.020***<br>[0.004]    | −0.245***<br>[0.087] | 0.023<br>[0.014]     |
| Trend                                                                  | 0.045***<br>[0.002]   | 0.048***<br>[0.002]  | 0.026***<br>[0.002]    | −0.500***<br>[0.052] | −0.037***<br>[0.008] |
| Observations                                                           | 26,254                | 26,254               | 26,254                 | 26,249               | 25,708               |
| Number of firms                                                        | 0.101                 | 0.069                | 0.122                  | 0.040                | 0.006                |
| R-squared                                                              | 7,608                 | 7,608                | 7,608                  | 7,607                | 7,505                |
| <b>Panel B: “Local” DD parallel trend test: bandwidth 25 employees</b> |                       |                      |                        |                      |                      |
| Treated $\times$ trend                                                 | −0.011<br>[0.014]     | −0.014<br>[0.014]    | 0.011<br>[0.016]       | −0.208<br>[0.390]    | −0.097**<br>[0.046]  |
| Trend                                                                  | 0.033***<br>[0.010]   | 0.036***<br>[0.010]  | 0.040***<br>[0.008]    | −0.351<br>[0.356]    | 0.048<br>[0.037]     |
| Observations                                                           | 948                   | 948                  | 948                    | 948                  | 859                  |
| Number of firms                                                        | 0.043                 | 0.036                | 0.102                  | 0.016                | 0.016                |
| R-squared                                                              | 276                   | 276                  | 276                    | 276                  | 264                  |
| <b>Panel C: “Local” DD parallel trend test: bandwidth 50 employees</b> |                       |                      |                        |                      |                      |
| Treated $\times$ trend                                                 | −0.025**<br>[0.012]   | −0.026**<br>[0.012]  | 0.002<br>[0.011]       | −0.362<br>[0.279]    | −0.075**<br>[0.035]  |
| Trend                                                                  | 0.042***<br>[0.007]   | 0.045***<br>[0.008]  | 0.051***<br>[0.006]    | 0.007<br>[0.263]     | 0.012<br>[0.029]     |
| Observations                                                           | 1,854                 | 1,854                | 1,854                  | 1,854                | 1,683                |
| Number of firms                                                        | 0.043                 | 0.043                | 0.132                  | 0.021                | 0.017                |
| R-squared                                                              | 534                   | 534                  | 534                    | 534                  | 510                  |

Notes: Standard errors in brackets. DD, difference-in-difference; ROA, an indicator of profitability; TFP, total factor productivity.

\*\*\*  $p < 0.01$ ; \*\*  $p < 0.05$ ; \*  $p < 0.1$ .
